# Supplementary material for: Instant, template-free and fluorine-free synthesis of TiO2 nanotube arrays with a room-temperature solid–liquid arc discharge technique
Source: Royal Society of Chemistry journal article supplement (doi:10.1039/c2ce25162k), 2012-01-01
Supplement: c2ce25162k.pdf [file c2ce25162k.pdf]

## Supporting Information

### **Instant, Template-Free and Fluorin-Free Synthesis of TiO<sub>2</sub> Nanotube Arrays with a Room-Temperature Solid-Liquid Arc Discharge Technique**

Xiaoyu Chen,<sup>#,†</sup> Yong Zhou,<sup>#,§,‡,\*</sup> Qi Liu,<sup>†,§,#</sup> Wenguang Tu,<sup>#,§</sup>  
Zhigang Zou,<sup>#,§,†,‡,\*</sup>

*National Laboratory of Solid State Microstructures, Eco-materials and Renewable  
Energy Research Center (ERERC), School of Physics, Department of Materials  
Science and Engineering, Nanjing University, Nanjing 210093, P. R. China. Anhui  
Polytechnic University, Wuhu 241000, P. R. China*

Email: zhouyong1999@nju.edu.cn; zgzou@nju.edu.cn

#### **FOOTNOTE**

\* To whom correspondence should be addressed.

# ERERC.

‡ School of Physics.

† Department of Materials Science and Engineering.

§ National Laboratory of Solid State Microstructures.

\$ Anhui Polytechnic University.

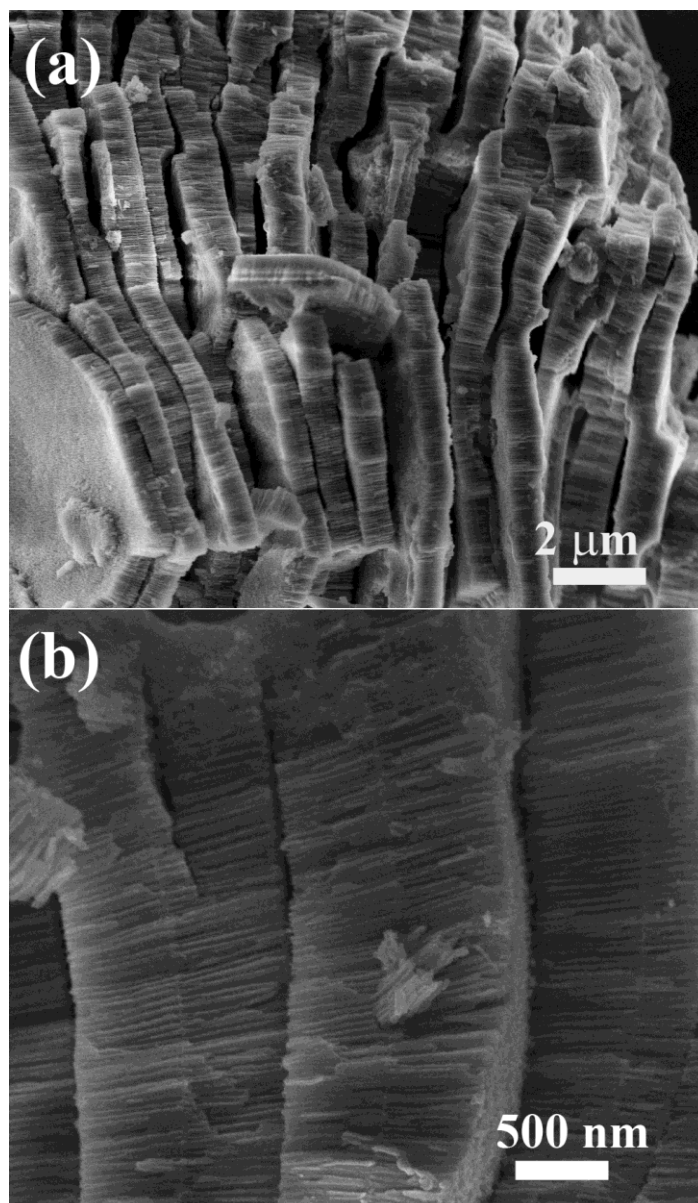

**Figure S11** Cross-sectional FE-SEM images of the TNAs at different magnification formed at AC 190 V in 0.1 M  $\text{NaNO}_3$ .

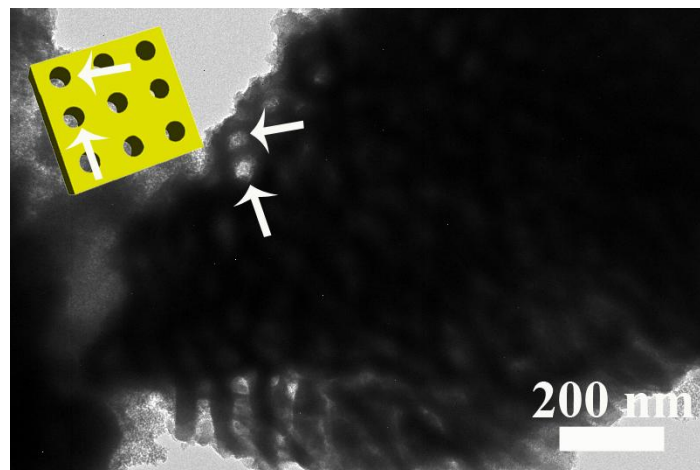

**Figure SI2** TEM image of the TNAs formed at AC 190 V in 0.1 M NaNO<sub>3</sub>, revealing open ends of the pore, marked with arrows. Inset: schematic illustration of TNAs viewing from a certain angle to show throughout pore.

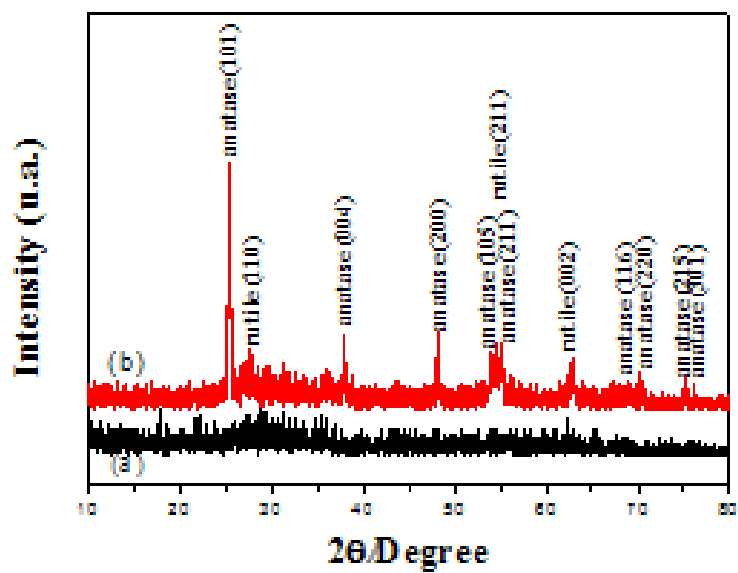

**Figure S13** XRD patterns of (a) as-formed TNAs formed at AC 190 V in 0.1 M NaNO<sub>3</sub>, (b) after calcinations at 400 °C for 1 h.

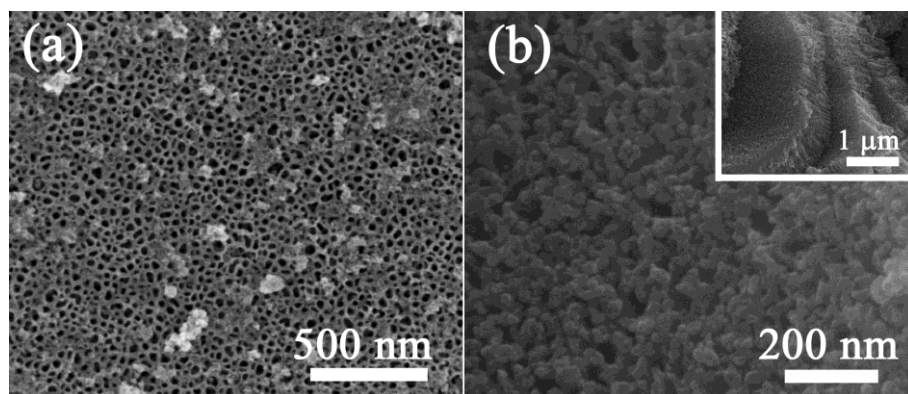

**Figure S14** FE-SEM images of TNA calcined (a) at 400 °C and (b) 500 °C for 1h.

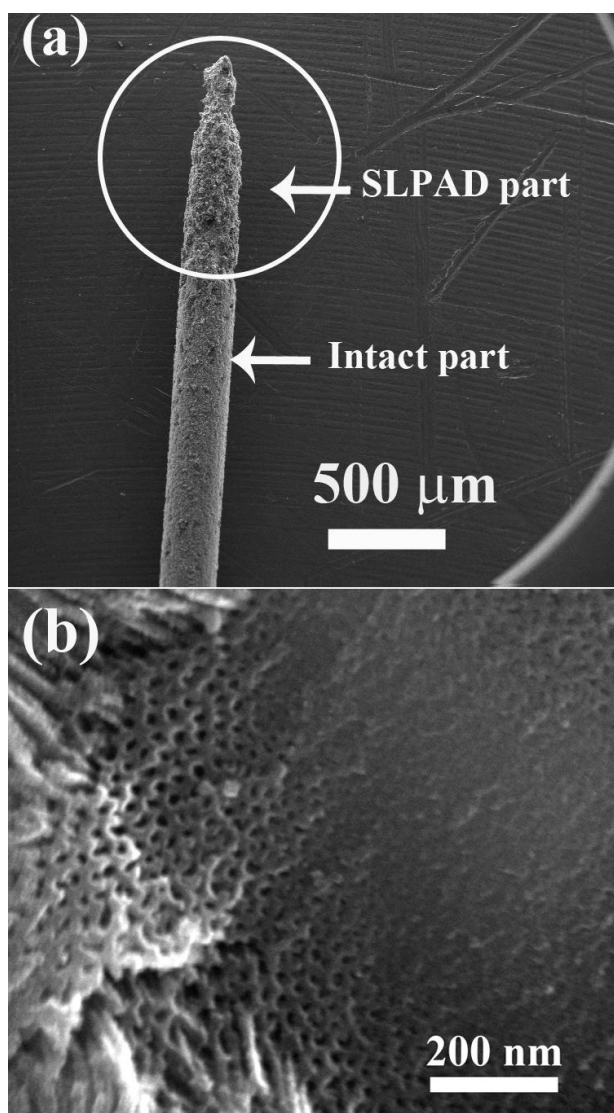

**Figure S15** FE-SEM images of *Electrode 2* (a) at low magnification, (b) the SLPAD-treated part of the electrode at high magnification.

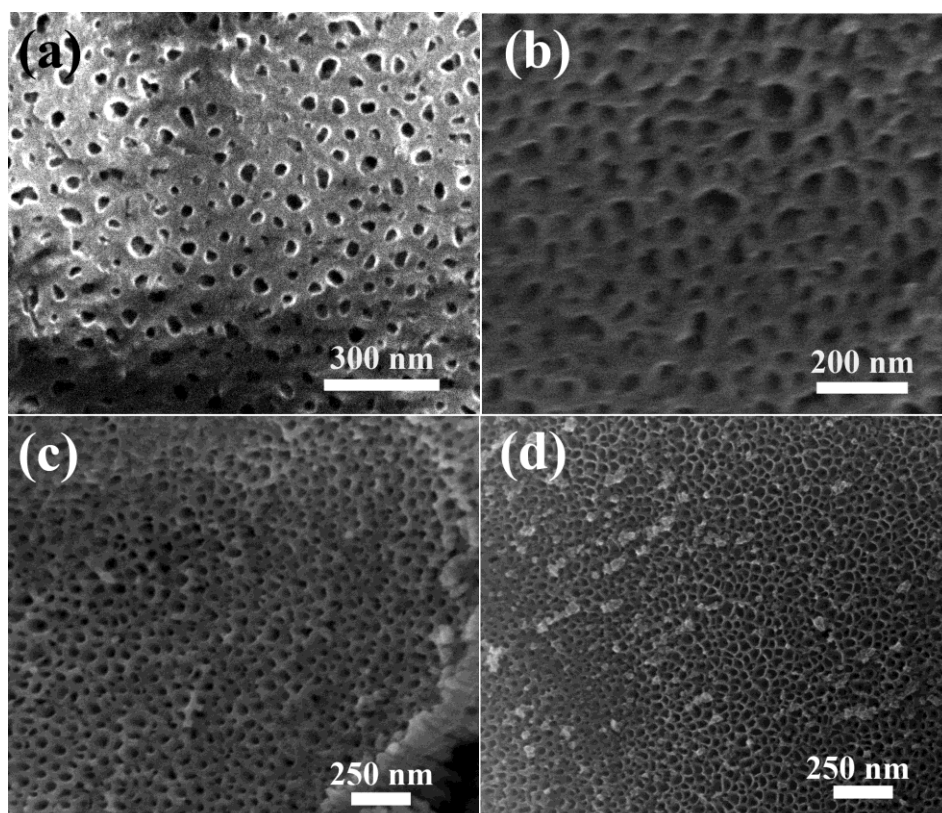

**Figure SI6** FE-SEM images of the TNAs formed in 0.1 M NaNO<sub>3</sub> at the applied AC voltage of (a) 20 V, 40 V, 80 V, and 150 V.



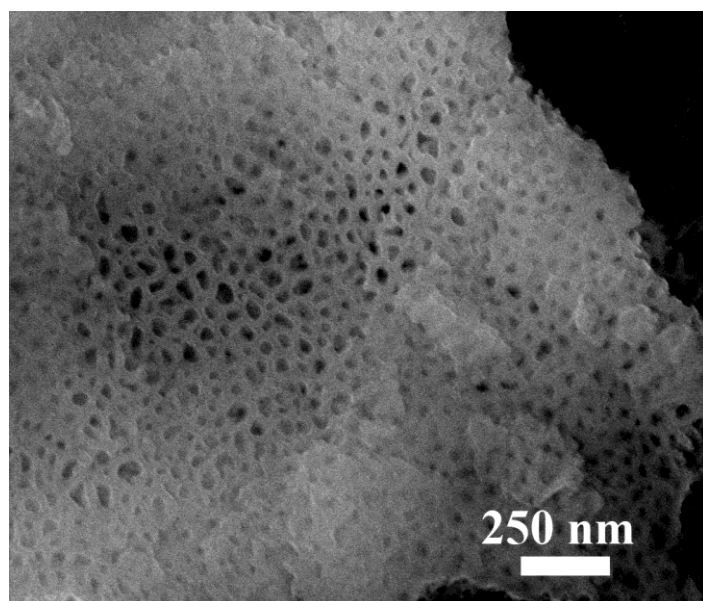

**Figure S17** FE-SEM image of the TNAs formed at AC 190 V in 0.01 M NaNO<sub>3</sub> solution.



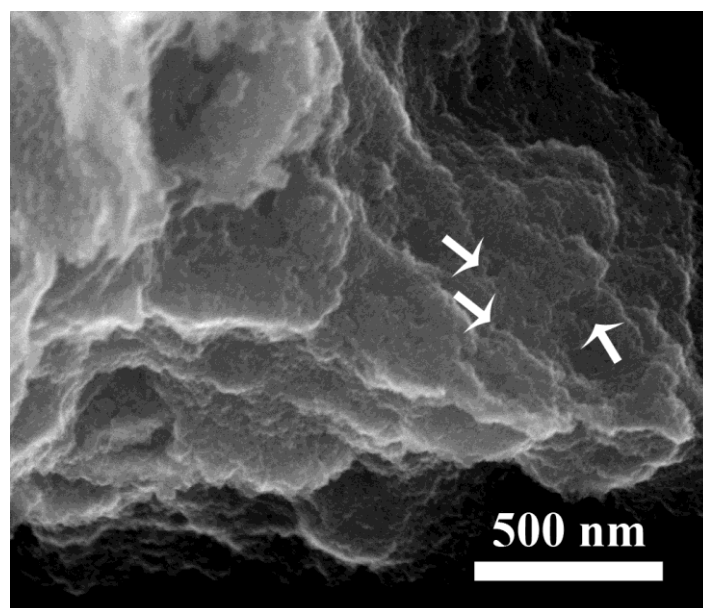

**Figure S18** FE-SEM image of the TiO<sub>2</sub> powder at DC 150 V in 0.1 M NaNO<sub>3</sub>.  
Arrow marked the random pores.
